# Supplementary material for: Food is medicine: actions to integrate food and nutrition into healthcare
Source: PubMed Central journal article supplement — BMJ. 2020 Jun 29;369:m2482. doi: 10.1136/bmj.m2482 (PMC7322667; doi:10.1136/bmj.m2482), 2020-06-29
Supplement: dows054661.ww1.pdf [file dows054661.ww1.pdf]

Table: A Continuum of International Food Insecurity and Food is Medicine Programs

| Country                           | Intervention                                                                                                                                                                                                                                                    | Funding/Support                                                                                                                                                                                                                                                                                                      | Considerations                                                                                                                                                                                                                                                                                                                                                                                                                                                                                                                                |
|-----------------------------------|-----------------------------------------------------------------------------------------------------------------------------------------------------------------------------------------------------------------------------------------------------------------|----------------------------------------------------------------------------------------------------------------------------------------------------------------------------------------------------------------------------------------------------------------------------------------------------------------------|-----------------------------------------------------------------------------------------------------------------------------------------------------------------------------------------------------------------------------------------------------------------------------------------------------------------------------------------------------------------------------------------------------------------------------------------------------------------------------------------------------------------------------------------------|
| Germany <sup>43</sup>             | 'Tafel' (table) Food Banking System                                                                                                                                                                                                                             | Philanthropy only, without public financing                                                                                                                                                                                                                                                                          | Means tested, but does not require referral from social worker or physician. Focus on healthy food but not specifically to improve clinical outcomes.                                                                                                                                                                                                                                                                                                                                                                                         |
| Finland <sup>44</sup>             | Universal Free School Meals (all children age 6-16) combined with nutrition education centered around the school meals                                                                                                                                          | Publicly financed at the municipality level                                                                                                                                                                                                                                                                          | Intended to provide nutritional support, and teach about healthy eating to prevent chronic conditions.                                                                                                                                                                                                                                                                                                                                                                                                                                        |
| Brazil <sup>45</sup>              | Bolsa Familia                                                                                                                                                                                                                                                   | Publicly financed                                                                                                                                                                                                                                                                                                    | Means tested, conditional cash transfer program created to alleviate widespread hunger; receipt of funds is conditioned on children's compliance with vaccination schedules and growth-monitoring healthcare visits.                                                                                                                                                                                                                                                                                                                          |
| Mexico <sup>46</sup>              | Prospera (formerly Oportunidades or Progresa)                                                                                                                                                                                                                   | Publicly financed                                                                                                                                                                                                                                                                                                    | Similar design to the program above: means tested, conditional cash transfer program where receipt of funds is conditioned on compliance with preventive health services; includes some Fortified Food Supplements for children and breastfeeding mothers.                                                                                                                                                                                                                                                                                    |
| Victoria, Australia <sup>47</sup> | Meals on Wheels Victoria provides daily home delivered meals over the short- or long-term. Aims to assist the elderly and those with disabilities to live independently. Local Councils or Health Services assess eligibility to receive a \$3.23/meal subsidy. | Clients pay a per meal cost minus any subsidy to which they are entitled. Volunteers deliver the meals. Partially funded by the Department of Human Services and Council's/Health Networks via the Home and Community Care Program. The Department of Health provides a \$3.23/meal subsidy to eligible individuals. | Meals on Wheels partners with other Home and Community Care Services in meal delivery. Volunteers who deliver meals can provide early warning that a client's health is deteriorating and support early intervention to prevent hospitalization.<br><br>* Note: Meals on Wheels programs providing meals to seniors are active in Canada, the UK, the US, Ireland, and more. The source of funding, nutrition quality, and level of nutritional tailoring in meals (e.g. option to receive diabetic meals) vary between and within countries. |

|                               |                                                                                                                                                                                                                                                                                                                                                                                                                                    |                                                                                     |                                                                                                                                                                                                                                                                                                                                                                            |
|-------------------------------|------------------------------------------------------------------------------------------------------------------------------------------------------------------------------------------------------------------------------------------------------------------------------------------------------------------------------------------------------------------------------------------------------------------------------------|-------------------------------------------------------------------------------------|----------------------------------------------------------------------------------------------------------------------------------------------------------------------------------------------------------------------------------------------------------------------------------------------------------------------------------------------------------------------------|
| Alberta, Canada <sup>13</sup> | Assured Income for the Severely Handicapped and Alberta Works Income Supports provide a supplemental monthly food allowance for individuals with medical conditions (e.g. type 2 diabetes) requiring special diets (range: \$21-\$113/month). Nutritional supplements (e.g. Boost, Ensure, vitamins) can be obtained via a Health Benefits Card. Health professionals provide written confirmation of the need for a special diet. | Publicly financed                                                                   | Physicians and other health professionals often identify eligible individuals and refer their patients to the program.                                                                                                                                                                                                                                                     |
| UK <sup>39</sup>              | Prescription for gluten-free breads and mixes for individuals with coeliac disease                                                                                                                                                                                                                                                                                                                                                 | The National Health Service spent 15.7 million pounds in 2017 on gluten-free foods. | The number of foods available through the prescription has narrowed in recent years to only bread and mixes (previously, the list of gluten-free foods provided by prescription included cakes, biscuits, and pastries). The prescription is designed to enable compliance with a coeliac disease comply with a gluten-free diet and prevent serious health complications. |

13 Special Diets, Income & Employment Supports Policy Manual, Alberta Government, <http://www.humanservices.alberta.ca/AWonline/IS/4874.html>.

39 Medi-Cal Medically Tailored Meals Pilot operating in the state of California's Medicaid program. <https://www.dhcs.ca.gov/services/ltc/Pages/Medically-tailored-Meals-Pilot-Program.aspx>

43 Simmet A, Tinnemann P, Stroebel-Benschop N. The German food bank system and its users – a cross-sectional study. *Int J Environ Res Public Health* 2018;15:1485. doi:10.3390/ijerph15071485

44 Ministry for Foreign Affairs of Finland & Finnish National Agency for Education. school meals for all: investment in effective learning – case Finland, June 2019 [https://www.oph.fi/sites/default/files/documents/um\\_casestudyfinland\\_schoolfeeding\\_june2019\\_netti.pdf](https://www.oph.fi/sites/default/files/documents/um_casestudyfinland_schoolfeeding_june2019_netti.pdf).

45 Shei A, Costa F, Reis MG, Ko AI. The impact of Brazil's Bolsa Família conditional cash transfer program on children's health care utilization and health outcomes. *BMC Int Health Hum Rights* 2014;14:10. doi:10.1186/1472-698X-14-10

46 García-Guerra A, Neufeld LM, Bonvecchio Arenas A, et al. Closing the Nutrition Impact Gap Using Program Impact Pathway Analyses to Inform the Need for Program Modifications in Mexico's Conditional Cash Transfer Program. *J Nutr* 2019;149(Suppl 1):2281S-9S. doi:10.1093/jn/nxz169</jrn>

47 Meals on Wheels Victoria <https://www.mealsonwheelsvictoria.org.au/index.htm>.
